# Supplementary material for: Mechanism by which arylamine N-acetyltransferase 1 ablation causes insulin resistance in mice
Source: PubMed Central journal article supplement — Proc Natl Acad Sci U S A. 2017 Dec 13;114(52):E11285–92. doi: 10.1073/pnas.1716990115 (PMC5748223; doi:10.1073/pnas.1716990115), 2017-12-13
Supplement: pnas.201716990SI.pdf [file pnas.201716990SI.pdf]

# Supporting Information

Camporez et al. 10.1073/pnas.1716990115

**Table S1. Hepatic DAG species from WT and KO mice fed either RC or a HFD at 12 wk of age**

| Species | WT (RC)      | KO (RC)      | WT (HFD)     | KO (HFD)      |
|---------|--------------|--------------|--------------|---------------|
| PO      | 31.7 ± 4.3   | 51.9 ± 14.2  | 99.1 ± 14.1  | 212.4 ± 48.7  |
| AE      | 317.2 ± 32.4 | 360.7 ± 44.3 | 487.6 ± 40.3 | 502.1 ± 98.7  |
| AP      | 3.0 ± 0.2    | 3.5 ± 0.3    | 4.2 ± 0.3    | 5.5 ± 0.5     |
| AS      | 5.9 ± 0.5    | 6.3 ± 0.7    | 8.9 ± 0.6    | 9.6 ± 1.8     |
| SS      | 3.7 ± 0.2    | 4.2 ± 0.2    | 7.4 ± 0.7    | 7.1 ± 0.6     |
| LS      | 3.8 ± 0.4    | 7.7 ± 1.8    | 5.4 ± 0.4    | 14.7 ± 2.4    |
| OS      | 2.9 ± 0.3    | 5.1 ± 1.3    | 8.0 ± 0.9    | 21.2 ± 4.5    |
| PP      | 6.2 ± 0.4    | 9.8 ± 1.9    | 17.1 ± 3.1   | 28.4 ± 6.2    |
| SP      | 2.5 ± 0.2    | 3.5 ± 0.6    | 6.9 ± 0.9    | 12.0 ± 2.4    |
| OO      | 76.4 ± 6.7   | 112 ± 23.5   | 180.8 ± 18.6 | 446.7 ± 103.1 |
| OL      | 26.5 ± 2.2   | 74.2 ± 24.2  | 46.4 ± 3.7   | 155.7 ± 31.3  |
| LL      | 10.3 ± 1.4   | 45.6 ± 17.4  | 9.3 ± 0.9    | 48.8 ± 11.3   |
| PL      | 56.8 ± 4.0   | 132.4 ± 38.4 | 101 ± 7.2    | 220.3 ± 34.4  |

DAG data are expressed as nanomole per gram. Data are represented as mean ± SEM (*n* = 8–12 per group).

**Table S2. Muscle DAG species from WT and KO mice fed either RC or a HFD at 12 wk of age**

| Species | WT (RC)    | KO (RC)     | WT (HFD)     | KO (HFD)     |
|---------|------------|-------------|--------------|--------------|
| PO      | 17.8 ± 1.7 | 33.6 ± 1.7  | 65.0 ± 8.8   | 61.6 ± 3.9   |
| AE      | 6.9 ± 0.6  | 13.0 ± 0.6  | 23.4 ± 1.2   | 26.3 ± 1.4   |
| AP      | 0.9 ± 0.1  | 1.8 ± 0.1   | 2.8 ± 0.1    | 3.2 ± 0.1    |
| AS      | 0.8 ± 0.1  | 1.6 ± 0.1   | 2.3 ± 0.1    | 2.6 ± 0.1    |
| SS      | 1.5 ± 0.1  | 2.9 ± 0.1   | 4.4 ± 0.2    | 4.9 ± 0.2    |
| LS      | 2.9 ± 0.2  | 5.5 ± 0.2   | 9.1 ± 0.6    | 10.0 ± 0.6   |
| OS      | 4.0 ± 0.4  | 7.6 ± 0.4   | 13.6 ± 1.2   | 14.2 ± 0.9   |
| PP      | 8.2 ± 0.8  | 15.5 ± 0.8  | 26.5 ± 2.2   | 25.0 ± 1.1   |
| SP      | 2.4 ± 0.2  | 4.6 ± 0.2   | 7.7 ± 0.6    | 7.8 ± 0.3    |
| OO      | 53.4 ± 5.2 | 100.0 ± 5.3 | 205.1 ± 24.2 | 211.6 ± 19.7 |
| OL      | 23.9 ± 2.3 | 45.2 ± 2.4  | 87.4 ± 10.0  | 94.4 ± 9.4   |
| LL      | 9.2 ± 0.9  | 17.4 ± 0.9  | 30.0 ± 2.9   | 34.2 ± 3.1   |
| PL      | 19.1 ± 1.8 | 36.1 ± 1.9  | 63.5 ± 6.8   | 66.0 ± 4.5   |

DAG data are expressed as nanomole per gram. Data are represented as mean ± SEM (*n* = 8–12 per group).

**Table S3. Hepatic ceramides species from WT and KO mice fed either RC or a HFD at 12 wk of age**

| Species | WT (RC)    | KO (RC)    | WT (HFD)     | KO (HFD)     |
|---------|------------|------------|--------------|--------------|
| C16     | 21.8 ± 0.7 | 21.0 ± 0.9 | 34.0 ± 2.3   | 37.5 ± 1.7   |
| C18     | 3.5 ± 0.2  | 3.4 ± 0.2  | 9.1 ± 0.9    | 10.7 ± 0.6   |
| C20     | 22.6 ± 1.1 | 24.2 ± 1.8 | 136.6 ± 18.3 | 200.4 ± 12.6 |
| C22     | 78.3 ± 5.2 | 86.9 ± 3.3 | 114.6 ± 8.1  | 103.4 ± 8.0  |
| C24:1   | 32.2 ± 0.8 | 33.6 ± 0.9 | 29.0 ± 2.2   | 31.3 ± 1.8   |
| C24     | 31.0 ± 1.5 | 35.6 ± 1.2 | 23.2 ± 1.3   | 20.5 ± 0.7   |

Ceramides data are expressed as nanomole per gram. Data are represented as mean ± SEM (*n* = 8–12 per group).

**Table S4. Muscle ceramides species from WT and KO mice fed either RC or a HFD at 12 wk of age**

| Species | WT (RC)    | KO (RC)    | WT (HFD)   | KO (HFD)   |
|---------|------------|------------|------------|------------|
| C16     | 17.3 ± 1.8 | 17.0 ± 2.3 | 9.4 ± 0.6  | 11.9 ± 0.7 |
| C18     | 4.6 ± 0.4  | 4.6 ± 0.6  | 52.7 ± 0.9 | 52.2 ± 1.9 |
| C20     | 4.0 ± 0.3  | 4.2 ± 0.5  | 33.3 ± 5.6 | 52.4 ± 9.0 |
| C22     | 42.4 ± 4.5 | 45.6 ± 6.3 | 20.0 ± 2.1 | 25.6 ± 3.3 |
| C24:1   | 21.6 ± 2.1 | 22.0 ± 3.0 | 16.5 ± 2.0 | 16.9 ± 1.9 |
| C24     | 22.5 ± 2.2 | 23.6 ± 3.2 | 13.8 ± 1.8 | 13.8 ± 1.7 |

Ceramides data are expressed as nanomole per gram. Data are represented as mean ± SEM ( $n = 8-12$  per group).
